# Supplementary material for: A comparative study of metal (Ni, Co, or Mn)-borate catalysts and their photodeposition on rGO/ZnO nanoarrays for photoelectrochemical water splitting
Source: Royal Society of Chemistry journal article supplement (doi:10.1039/c8ta06921b), 2018-01-01
Supplement: c8ta06921b1.pdf [file c8ta06921b1.pdf]

## Supporting Information

### **A Comparative Study of Metal (Ni, Co, or Mn)-Borate Catalysts and Their Photodeposition on rGO/ZnO Nanoarrays for Photoelectrochemical Water Splitting**

Huayang Zhang,<sup>‡ab</sup> Wenjie Tian,<sup>‡a</sup> Yunguo Li,<sup>‡c</sup> Hongqi Sun,<sup>\*b</sup> Moses O. Tadé<sup>a</sup> and Shaobin Wang<sup>\*a</sup>

<sup>a</sup> *WA School of Mines: Minerals, Energy and Chemical Engineering, Curtin University, GPO Box U1987, WA 6845, Australia. E-mail: shaobin.wang@curtin.edu.au*

<sup>b</sup> *School of Engineering, Edith Cowan University, 270 Joondalup Drive, Joondalup, WA 6027, Australia. E-mail: h.sun@ecu.edu.au*

<sup>c</sup> *Department of Earth Sciences, University College London, Gower Street, London WC1E 6BT, United Kingdom.*

<sup>‡</sup> *These authors contributed equally.*

#### **1. Simulation details**

We performed spin-polarized DFT calculations in order to elucidate the OER activities of M-Bi (M = Ni, Co, Mn). We used the Vienna *Ab initio* Simulations Package (VASP)<sup>1,2</sup> and projected augmented wave (PAW)<sup>3-5</sup> method for total energy calculations. In the calculations, 3*d* and 4*s* electrons were treated as valence electrons for Ni, Co and Mn, and 2*s* and 2*p* for O. The exchange-correlation interaction was treated with Generalized gradient approximation (GGA) parameterized by Perdew, Burke and Ernzerhof (PBE).<sup>6</sup> For strongly localized *d* electrons, the GGA has systematic and noncancelling errors.<sup>7</sup> So, we adopted GGA+U<sup>8</sup> to correct the self-interaction error and overdelocalized *d* states. The effective U<sub>eff</sub> introduced by Dudarev et al.<sup>8</sup> was used with 5.25, 4.5 and 5.5 eV for Ni,<sup>8</sup> Co,<sup>9</sup> and Mn,<sup>10</sup> respectively.

We started from relaxing bulk MO<sub>2</sub> (space group *R3m*, No. 166) composed of MO<sub>6</sub> octahedra. The cutoff energy of plane-wave basis was set to 520 eV, and integrations over the first Brillouin zone were made using Gamma-centred k-point sets of 8×8×8. With these settings, the total energy was able to converge within 1 meV/atom. Atomic positions were fully relaxed with the energy converged within 10<sup>-6</sup> eV/cell and the force converged to less than 10<sup>-4</sup> eV/Å. Then, we relaxed the (100) surface with a single layer of MO<sub>6</sub> octahedra spaced by 17 Å. The (101)

zigzag ribbons were also relaxed in slab calculations. The same cutoff energy and similar k-point grids as dense as in the bulk calculations (in the case of vacuum direction, only Gamma point was used) were used for slab calculations. The detailed treatment of OER free energy calculations can be found in our previous publication.<sup>11</sup>

## **2. Materials characterizations**

X-ray diffraction spectra were recorded on an Empyrean multi-purpose research diffractometer (Panalytical Empyrean XRD) using the filtered Cu K $\alpha$  radiation ( $\lambda = 1.5418 \text{ \AA}$ ) with an accelerating voltage of 40 kV and a current of 40 mA. The transmission electron microscopy (TEM) images were obtained on a JEOL 2100 TEM microscope (120 kV) and FEI TITAN G2 (200 kV). The high angle annular dark field scanning transmission electron microscopy (HAADF-STEM) images and EDX mapping analysis were carried out on FEI TITAN G2 (200 kV). X-ray photoelectron spectroscopy (XPS) was conducted under ultrahigh vacuum condition on a Kratos Axis Ultra DLD system. UV-visible diffuse reflectance spectra were collected on a Cary 100 UV-visible spectrophotometer (Agilent, US).

## **3. Real-time oxygen measurements**

An oxygen sensor (Ocean Optics, Neoflex, FOSPOR-R 1/16) was inserted into the photoelectrolytic glass cell to probe the produced O<sub>2</sub> concentration via the fluorescence quenching method during the stability test. The glass cell has a quartz window (the volume of the headspace was 30 mL, excluding the space occupied by the septum, oxygen sensor, and the solution). The needle probe was inserted into the 1/16" threaded holes through a rubber septum and conducted uninterrupted O<sub>2</sub> readings at 5 s intervals throughout the test. Ahead of the detection, the probe was calibrated through a 2-point method, with a reading error of 1%. Before irradiation, the reactor was purged with N<sub>2</sub> for 10 min to exclude air in the reaction system. The test started from 10 min baseline reading followed by 100 min irradiation under AM 1.5G simulated solar light (light intensity: 1 sun or 100 mW cm<sup>-2</sup>) with the potentiostatic method (at 1.23 V vs. RHE).

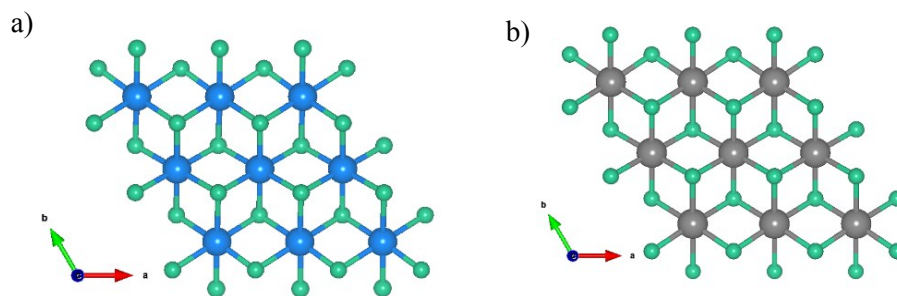

**Fig. S1** Model structures for a)  $\text{CoO}_6$  and b)  $\text{MnO}_6$ .

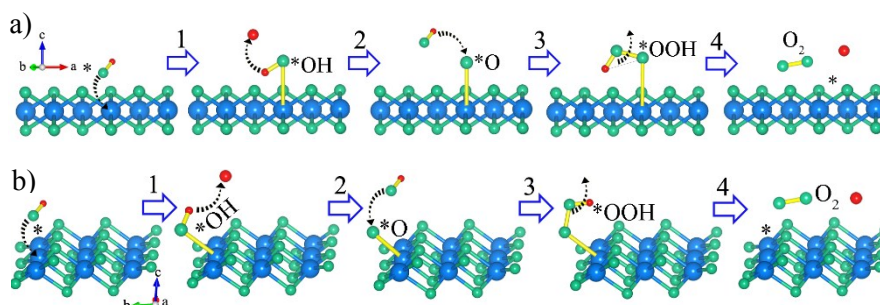

**Fig. S2** Proposed 4-step OER paths with  $\ast\text{OH}$ ,  $\ast\text{O}$  and  $\ast\text{OOH}$  adsorbed on selected Co sites at a) (001) surface and b) (101) surface of  $\text{CoO}_6$  (pH = 9.2).

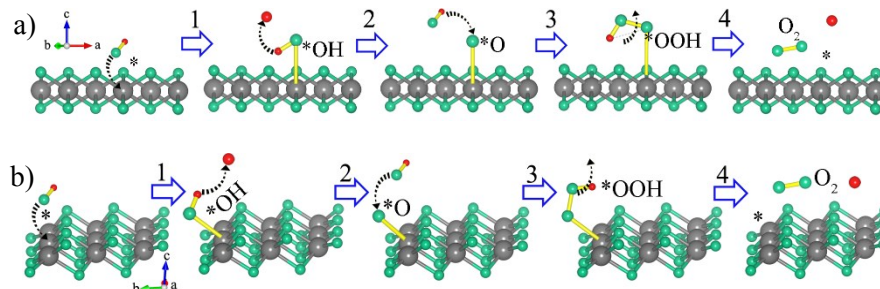

**Fig. S3** Proposed 4-step OER paths with  $\ast\text{OH}$ ,  $\ast\text{O}$  and  $\ast\text{OOH}$  adsorbed on selected Co sites at a) (001) surface and b) (101) surface of  $\text{MnO}_6$  (pH = 9.2).

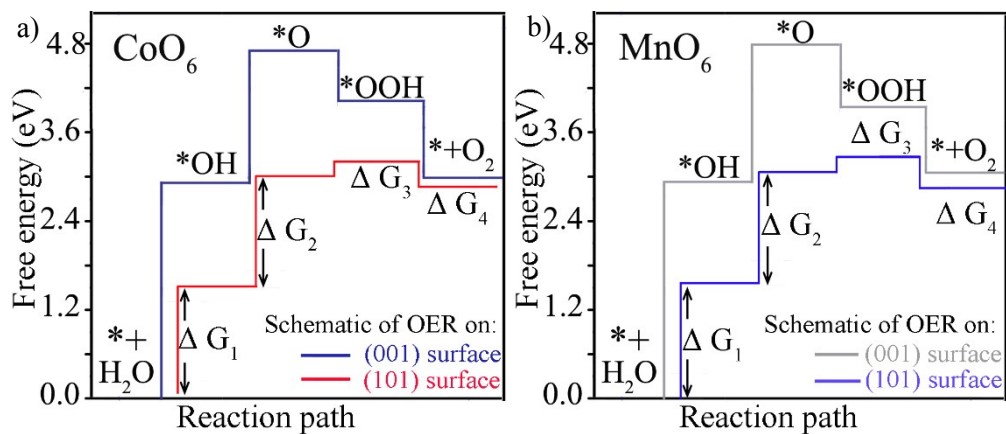

**Fig. S4** Diagrams of the 4-step Gibbs free energy changes calculated on the (001) surface and (101) surface in a)  $\text{CoO}_6$  and b)  $\text{MnO}_6$ .

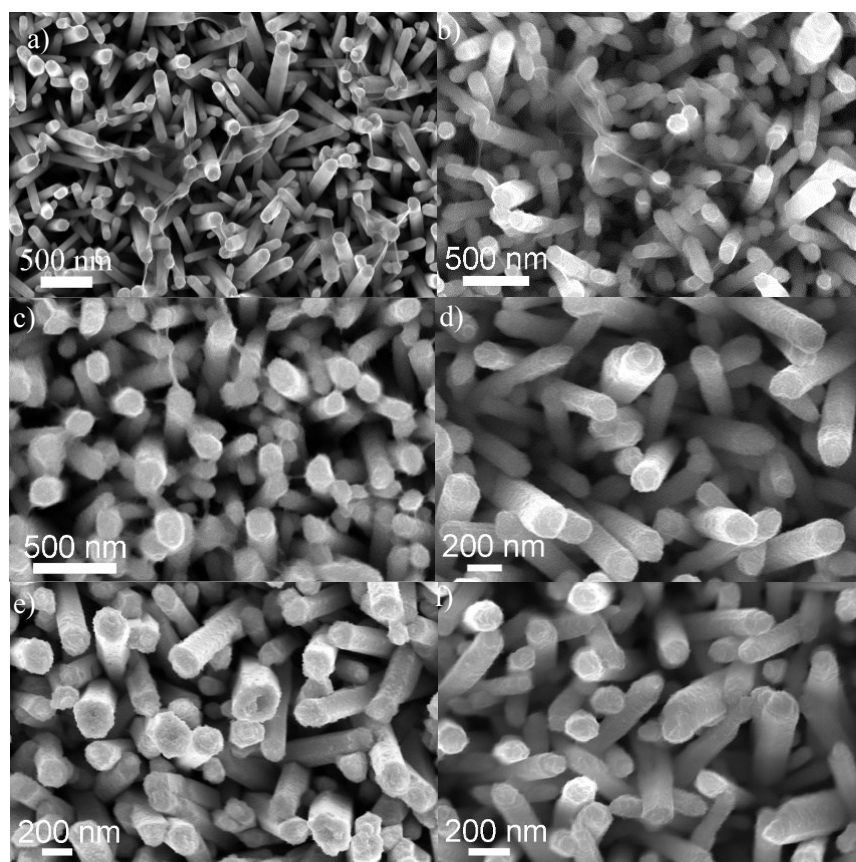

**Fig. S5** SEM images of a) rGO/ZnO, b) Co-Bi/rGO/ZnO, c) Mn-Bi/rGO/ZnO, d) Ni-Bi/ZnO, e) Co-Bi/ZnO and f) Mn-Bi/ZnO.

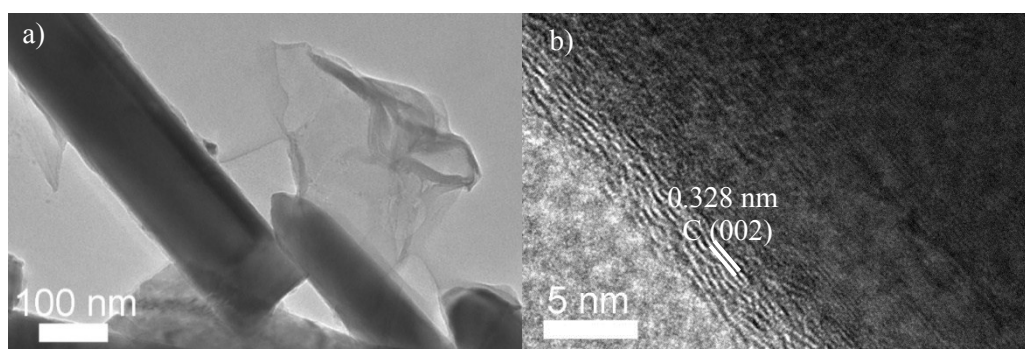

**Fig. S6** a) TEM and b) HRTEM images of rGO/ZnO.

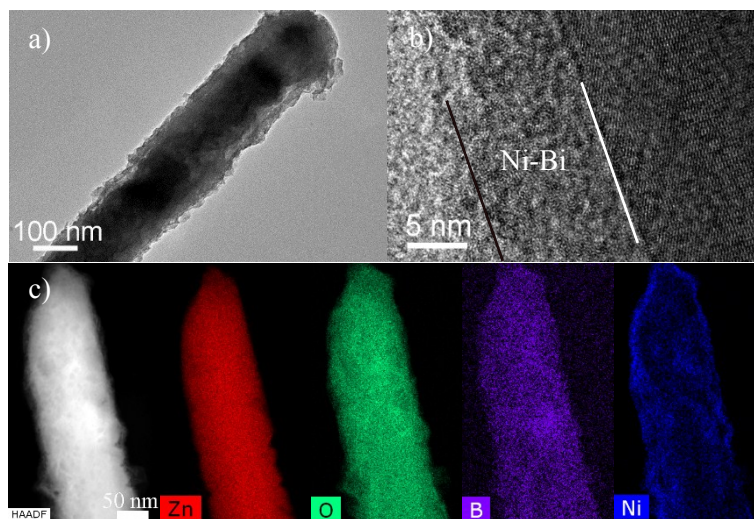

**Fig. S7** a) TEM, b) HRTEM and c) HAADF-STEM with EDX mapping images of Ni-Bi/ZnO.

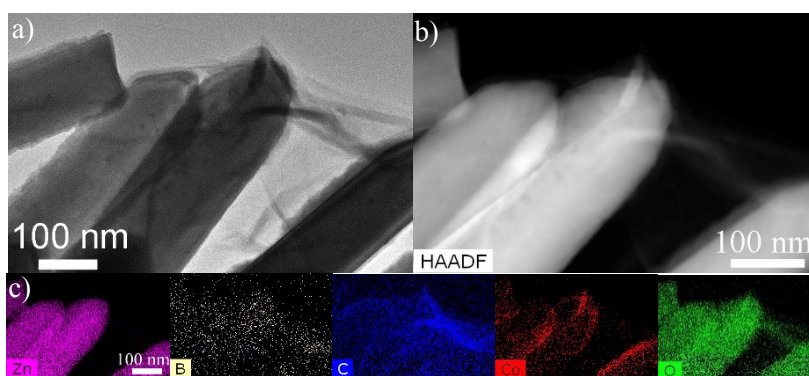

**Fig. S8** a) TEM, b) HAADF-STEM and c) EDX mapping images of Co-Bi/rGO/ZnO.

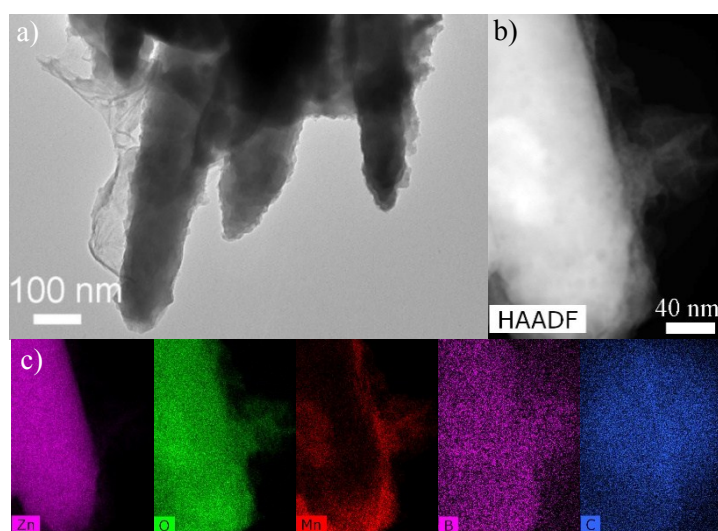

**Fig. S9** a) TEM, b) HAADF-STEM and c) EDX mapping images of Mn-Bi/rGO/ZnO.

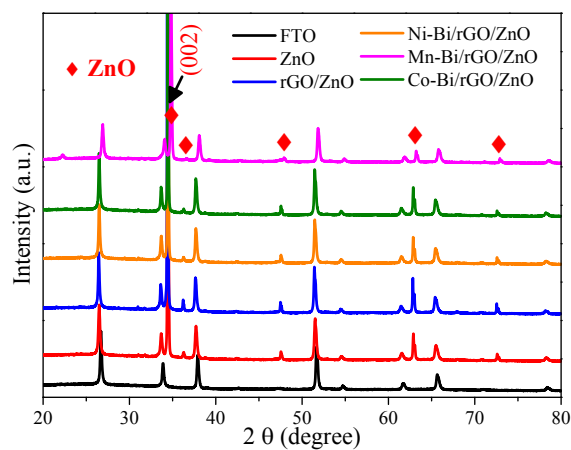

**Fig. S10** XRD patterns of FTO substrate, ZnO, rGO/ZnO and M-Bi/rGO/ZnO.

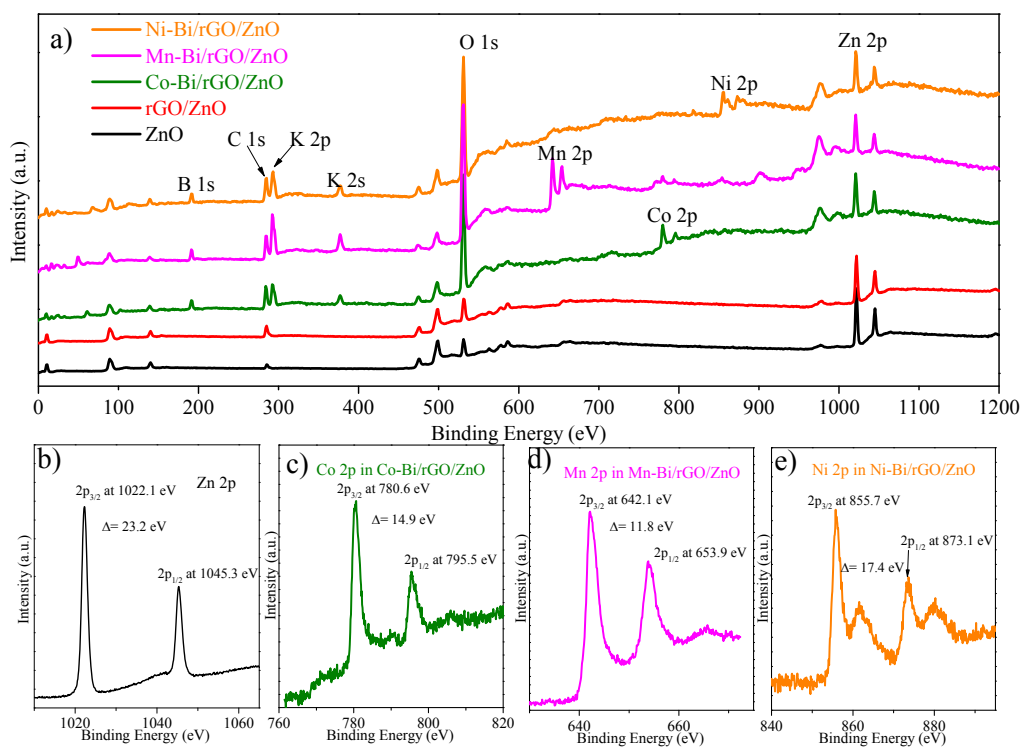

**Fig. S11** a) Full XPS spectra of the samples and high-resolution spectra of b) Zn 2p, c) Co 2p, d) Mn 2p and e) Ni 2p.

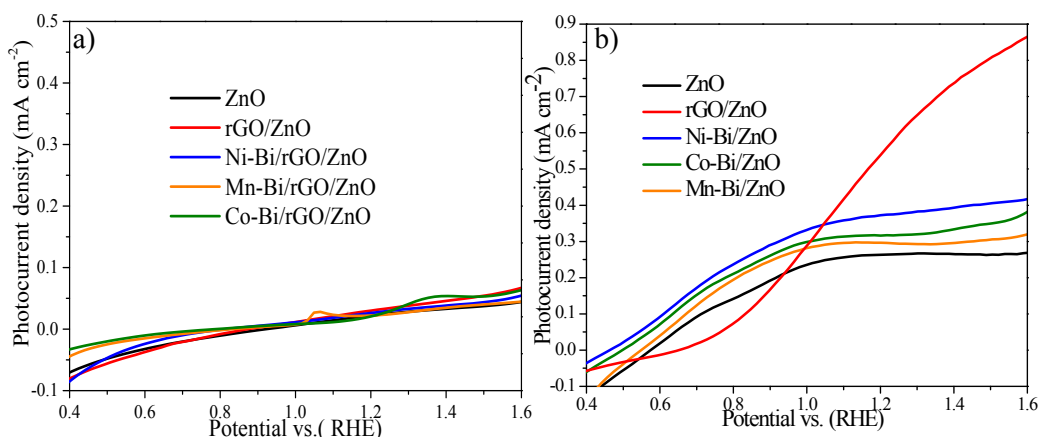

**Fig. S12** J-V curves tested on ZnO, rGO/ZnO, and M-Bi/ZnO under a) dark condition and b) irradiation.

In dark condition (Fig. S12a), the small peaks observed on Mn-Bi/rGO/ZnO (at 1.05 V) and Co-Bi/rGO/ZnO (at 1.4 V) were caused by the valence state changes of Mn and Co species due to the oxidation.<sup>12,13</sup>

**Table S1.** A comparison of the PEC performance of Ni-Bi/rGO/ZnO with previously reported ZnO-based catalysts for water oxidation in a mild medium under light intensity of 100 mW cm<sup>-2</sup>.

| Photoanode                                  | Photocurrent density (potentials vs. RHE) | Testing condition                     | Reference |
|---------------------------------------------|-------------------------------------------|---------------------------------------|-----------|
| C-doped ZnO                                 | 1.00 mA cm <sup>-2</sup> at 1.61 V        | 0.5 M Na <sub>2</sub> SO <sub>4</sub> | 14        |
| Au NP/ZnFe <sub>2</sub> O <sub>4</sub> /ZnO | 1.1 mA cm <sup>-2</sup> at 1.4 V          | 0.5 M Na <sub>2</sub> SO <sub>4</sub> | 15        |
| 3D ZnO/TiO <sub>2</sub> /FeOOH NWs          | 1.59 mA cm <sup>-2</sup> at 1.8 V         | 0.5 M Na <sub>2</sub> SO <sub>4</sub> | 16        |
| Ni(OH) <sub>2</sub> /ZnO NR                 | ~0.90 mA cm <sup>-2</sup> at 1.2 V        | 0.5 M Na <sub>2</sub> SO <sub>4</sub> | 17        |
| Au-ZnO nanopencil                           | ~1.5 mA cm <sup>-2</sup> at 1.6 V         | 0.5 M Na <sub>2</sub> SO <sub>4</sub> | 18        |
| ZnO-Au-SnO <sub>2</sub> nanorods            | 0.08 mA cm <sup>-2</sup> at 1.4 V         | 0.5 M Na <sub>2</sub> SO <sub>4</sub> | 19        |
| (N-GQDs)/ZnO nanowire                       | ~0.6 mA cm <sup>-2</sup> at 1.63 V        | 0.5 M Na <sub>2</sub> SO <sub>4</sub> | 20        |
| CdS/RGO/ZnO Nanowire                        | 0.8 mA cm <sup>-2</sup> at 1.63 V         | 0.1 M phosphate buffer solution       | 21        |
| Three-dimensional ZnO nanoforests           | 0.919 mA cm <sup>-2</sup> at 1.81 V       | 0.5 M Na <sub>2</sub> SO <sub>4</sub> | 22        |
| Au-ZnO Nanowire                             | 1.3 mA cm <sup>-2</sup> at 1.6 V          | 0.5 M Na <sub>2</sub> SO <sub>4</sub> | 23        |
| ZnO-IrOx nanorod                            | 0.7 mA cm <sup>-2</sup> at 1.2 V          | 0.25M Na <sub>2</sub> SO <sub>4</sub> | 24        |
| Ni-Bi/rGO/ZnO                               | 1.15 mA cm <sup>-2</sup> at 1.6 V         | 0.2 M K-Bi                            | This work |

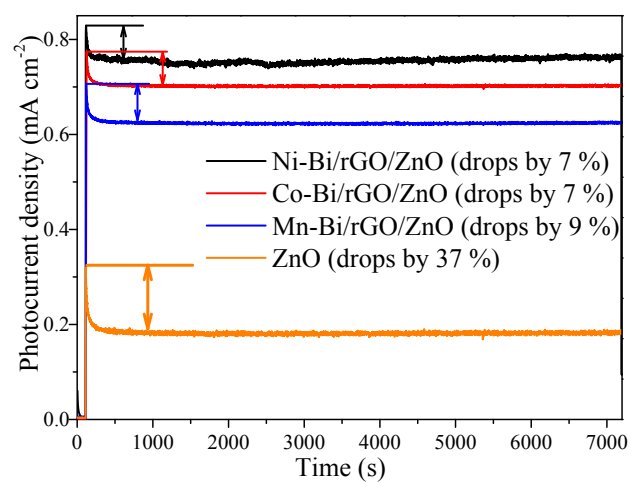

**Fig. S13** Potentiostatic measurements (at 1.23 V vs RHE) of ZnO and M-Bi/rGO/ZnO.

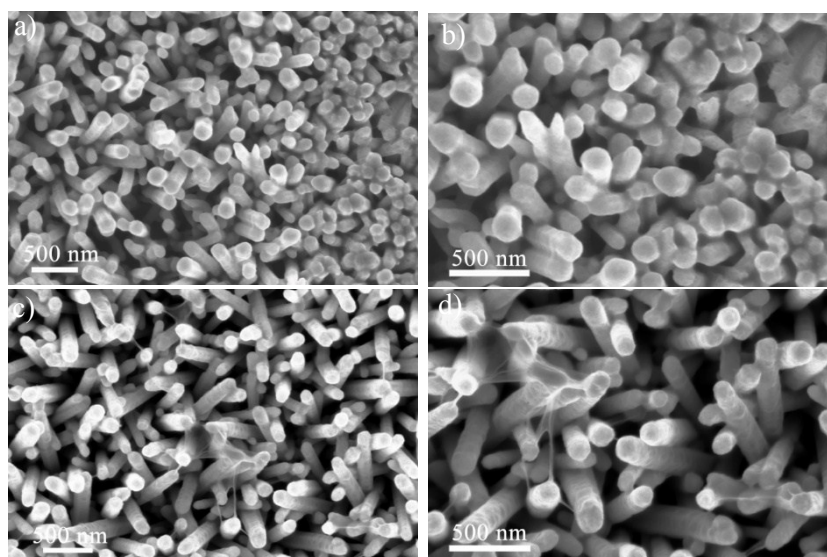

**Fig. S14** SEM images of a, b) ZnO and c, d) Ni-Bi/rGO/ZnO after potentiostatic measurements.



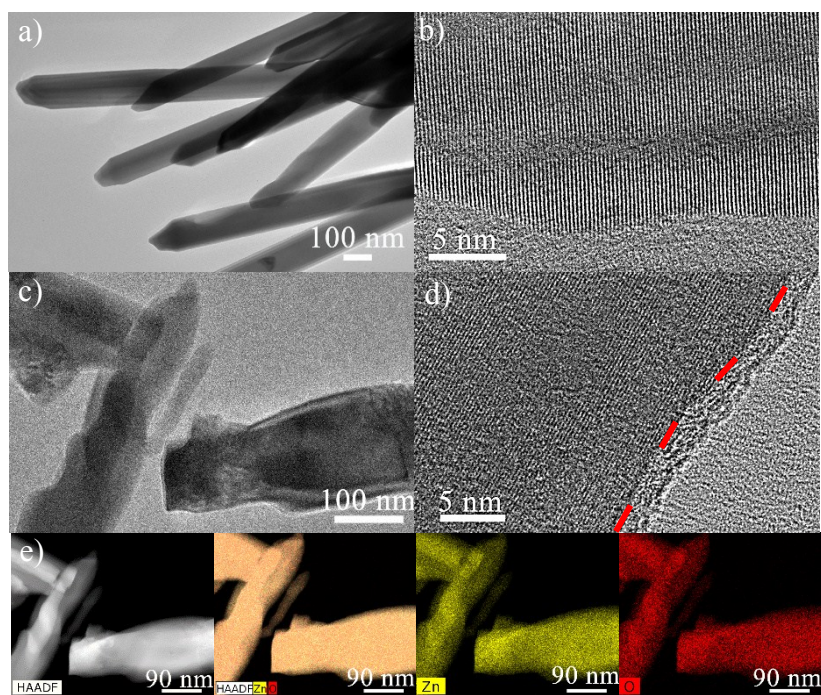

**Fig. S15** a) TEM and b) HRTEM images of pristine ZnO. c) TEM, d) HRTEM and e) HAADF-STEM with corresponding EDS mapping images of ZnO after the potentiostatic measurement.

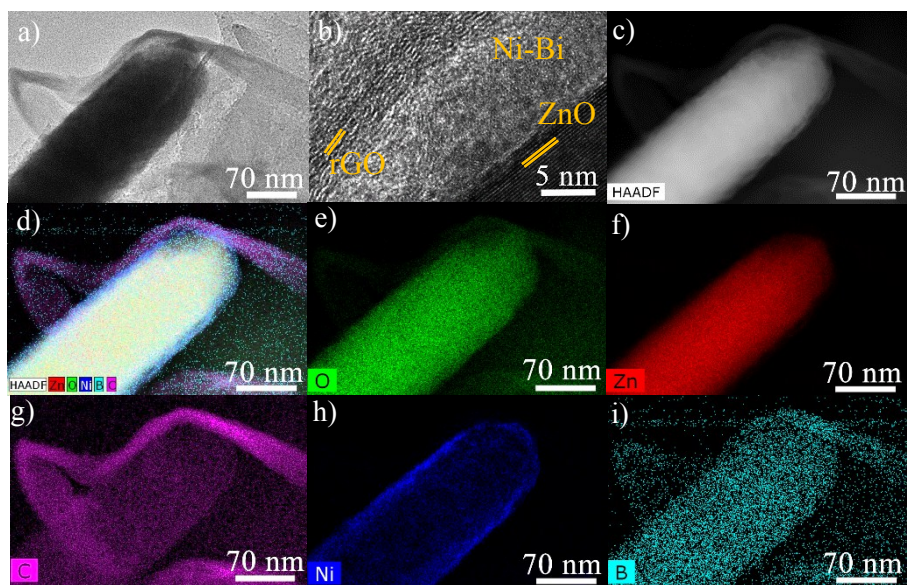

**Fig. S16** a) TEM, b) HRTEM, c) HAADF-STEM, and d-i) EDS mapping images of Ni-Bi/rGO/ZnO after the potentiostatic measurement.

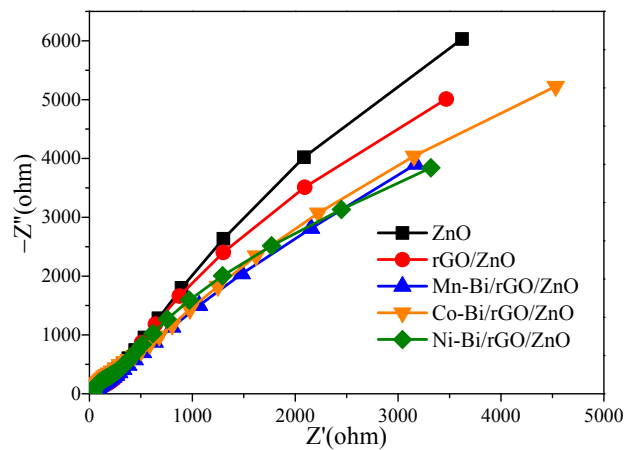

**Fig. S17** Electrochemical impedance spectra (EIS) measured in dark.

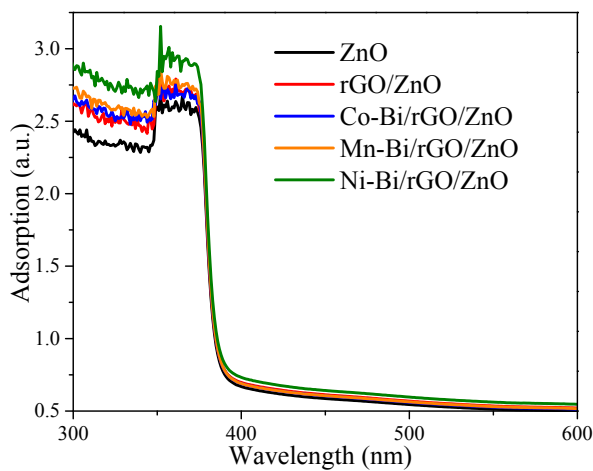

**Fig. S18** UV-vis diffuse reflectance spectra of ZnO, rGO/ZnO and M-Bi/rGO/ZnO.

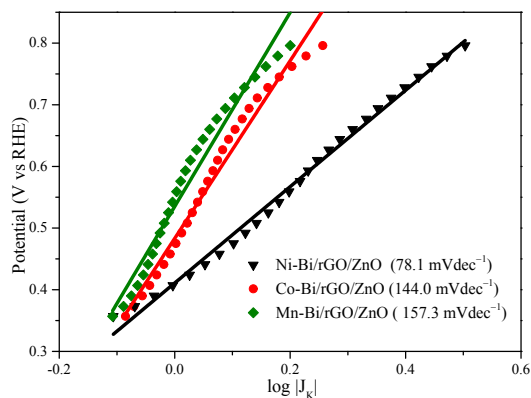

**Fig. S19** Tafel plots for M-Bi/rGO/ZnO.

## REFERENCES

- 1 G. Kresse and D. Joubert, *Phys. Rev. B*, 1999, **59**, 1758–1775.

- 2 P. E. Blöchl, *Phys. Rev. B*, 1994, **50**, 17953–17979.
- 3 G. Kresse and J. Furthmüller, *Comput. Mater. Sci.*, 1996, **6**, 15–50.
- 4 G. Kresse and J. Furthmüller, *Phys. Rev. B*, 1996, **54**, 11169–11186.
- 5 G. Kresse and J. Hafner, *Phys. Rev. B*, 1993, **48**, 13115–13118.
- 6 J. P. Perdew, K. Burke and M. Ernzerhof, *Phys. Rev. Lett.*, 1996, **77**, 3865–3868.
- 7 Y. Li, Y.-L. Li, B. Sa and R. Ahuja, *Catal. Sci. Technol.*, 2017, **7**, 545–559.
- 8 S. Dudarev and G. Botton, *Phys. Rev. B - Condens. Matter Mater. Phys.*, 1998, **57**, 1505–1509.
- 9 C. Ling, L. Q. Zhou and H. Jia, *RSC Adv.*, 2014, **4**, 24692–24697.
- 10 D. A. Tompsett, D. S. Middlemiss and M. S. Islam, *Phys. Rev. B - Condens. Matter Mater. Phys.*, 2012, **86**, 1–8.
- 11 H. Zhang, W. Tian, Y. Li, H. Sun, M. O. Tade and S. Wang, *J. Mater. Chem. A*, 2018, **6**, 6265–6272.
- 12 C. Gandolfi, T. Cotting, P. N. Martinho, O. Sereda, A. Neels, G. G. Morgan and M. Albrecht, *Dalt. Trans.*, 2011, **40**, 1855–1865.
- 13 R. S. Khnayzer, M. W. Mara, J. Huang, M. L. Shelby, L. X. Chen and F. N. Castellano, *ACS Catal.*, 2012, **2**, 2150–2160.
- 14 D. A. Links, *Nanoscale*, 2012, **4**, 6515–6519.
- 15 A. Sheikh, A. Yengantiwar, M. Deo and S. Kelkar, *Small*, 2013, **9**, 2091–2096.
- 16 Z. Li, S. Feng, S. Liu, X. Li, L. Wang and W. Lu, *Nanoscale*, 2015, **7**, 19178–19183.
- 17 Y. Mao, H. Yang, J. Chen and J. Chen, *Nano Energy*, 2014, **6**, 10–18.
- 18 J. Gong, *Nanoscale*, 2014, **7**, 77–81.
- 19 J. Li, H. Cheng, Y. Chiu and Y. Hsu, *Nanoscale*, 2016, **8**, 15720–15729.
- 20 Z. Zeng, F. Xiao, X. Gui, R. Wang, T. Thatt and Y. Tan, *J. Mater. Chem. A*, 2016, **4**, 16383–16393.
- 21 K. Zhao, X. Yan, Y. Gu, Z. Kang, Z. Bai, S. Cao, Y. Liu, X. Zhang and Y. Zhang, *Small*, 2016, **12**, 245–251.
- 22 V. A. Online, *Nanoscale*, 2014, **6**, 8769–8780.
- 23 C. E. T. Al, *ACS Nano*, 2012, **6**, 7362–7372.
- 24 D. Shao, Y. Cheng, J. He, D. Feng, L. Zheng, L. Zheng, X. Zhang, J. Xu, W. Wang, W. Wang, F. Lu, H. Dong, L. Li, H. Liu, R. Zheng and H. Liu, *ACS Catal.*, 2017, **7**, 5308–5315.
